# Supplementary material
Source: PubMed Central journal article supplement (PMC2077251)

a

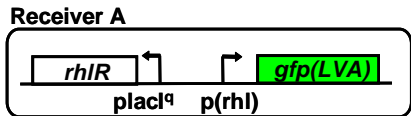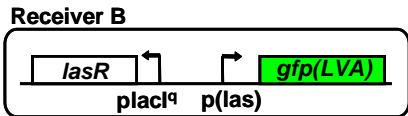

b

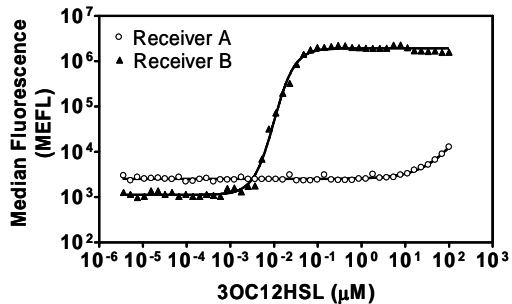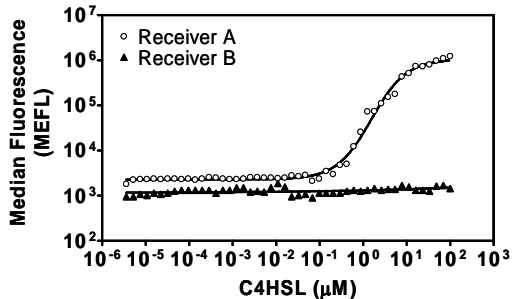

Supplement: pnas_0704256104_1.pdf [file pnas_0704256104_1.pdf]

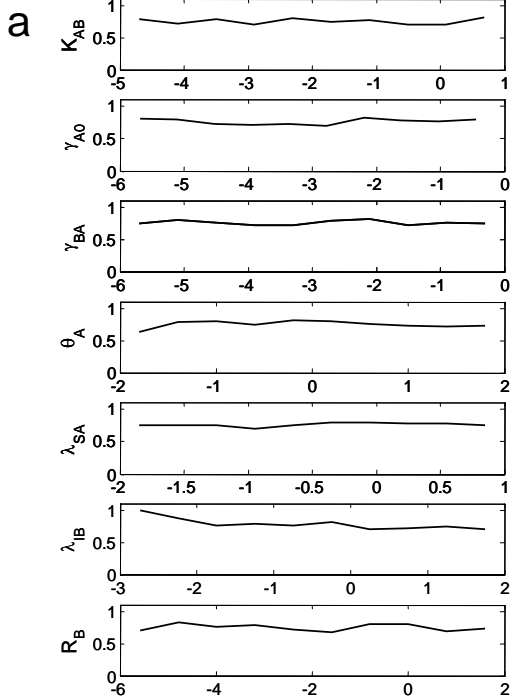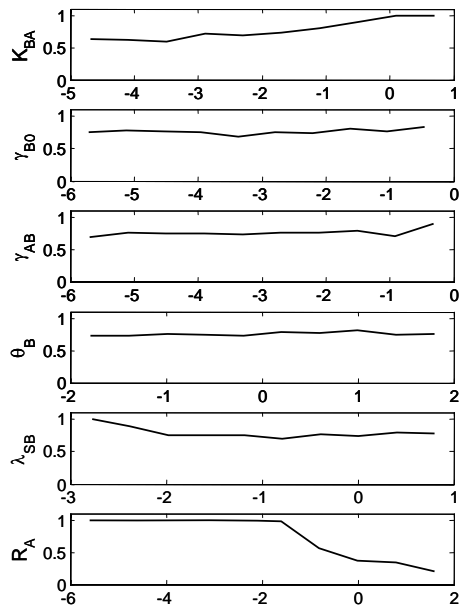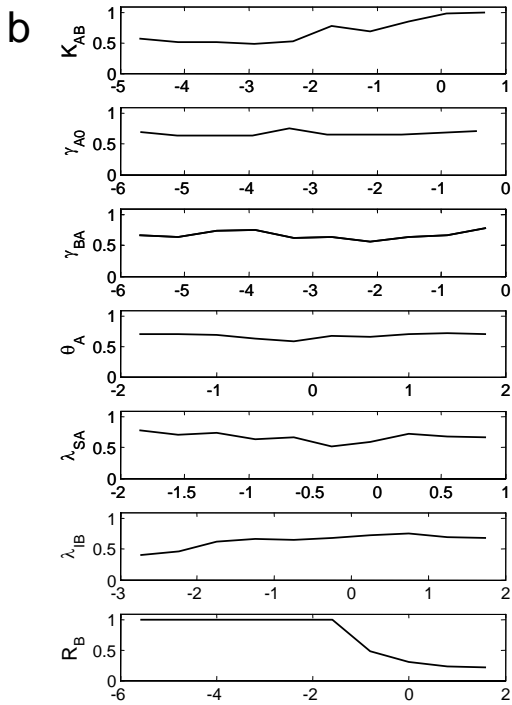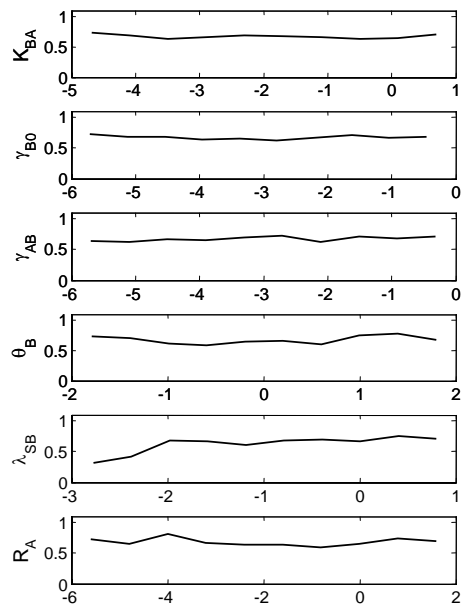

Supplement: pnas_0704256104_2.pdf [file pnas_0704256104_2.pdf]

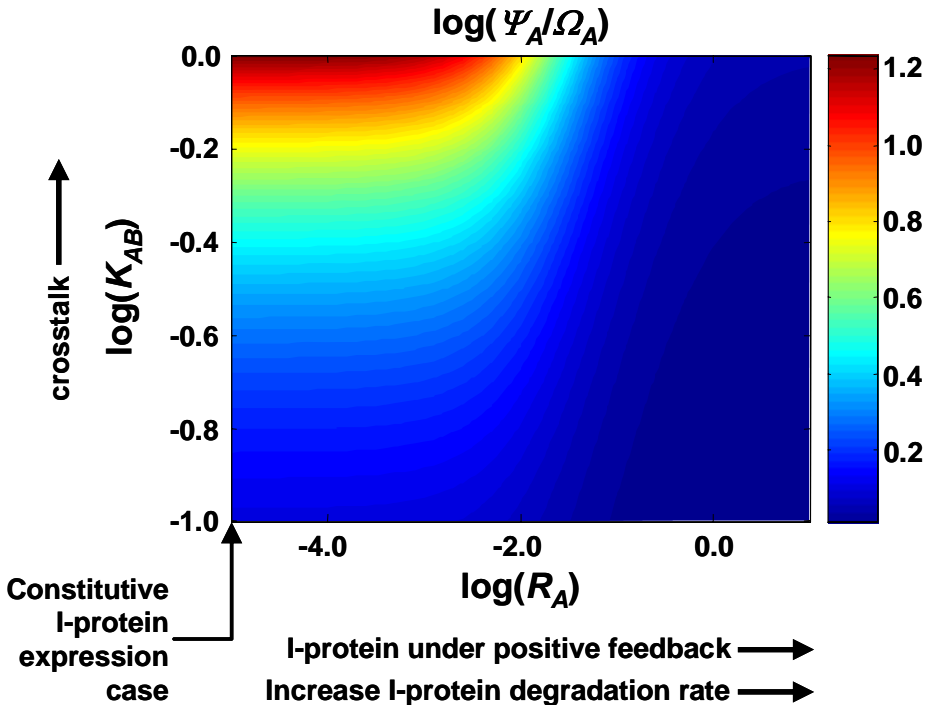

Supplement: pnas_0704256104_3.pdf [file pnas_0704256104_3.pdf]

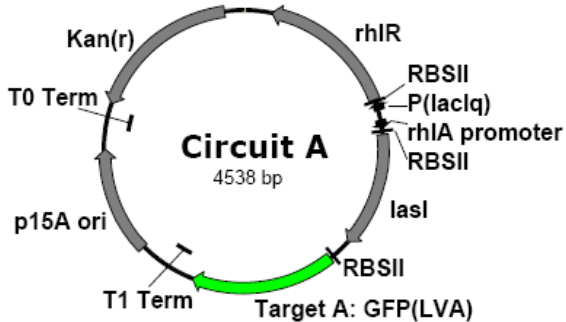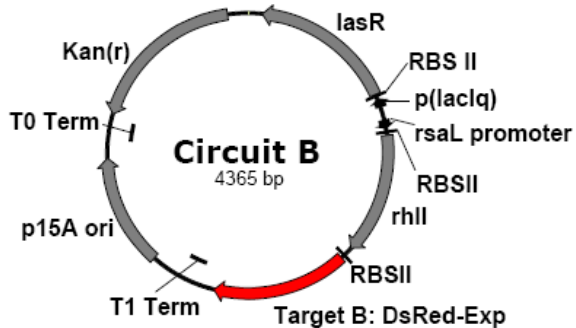

Supplement: pnas_0704256104_4.pdf [file pnas_0704256104_4.pdf]

Median Fluorescence (MEFL)

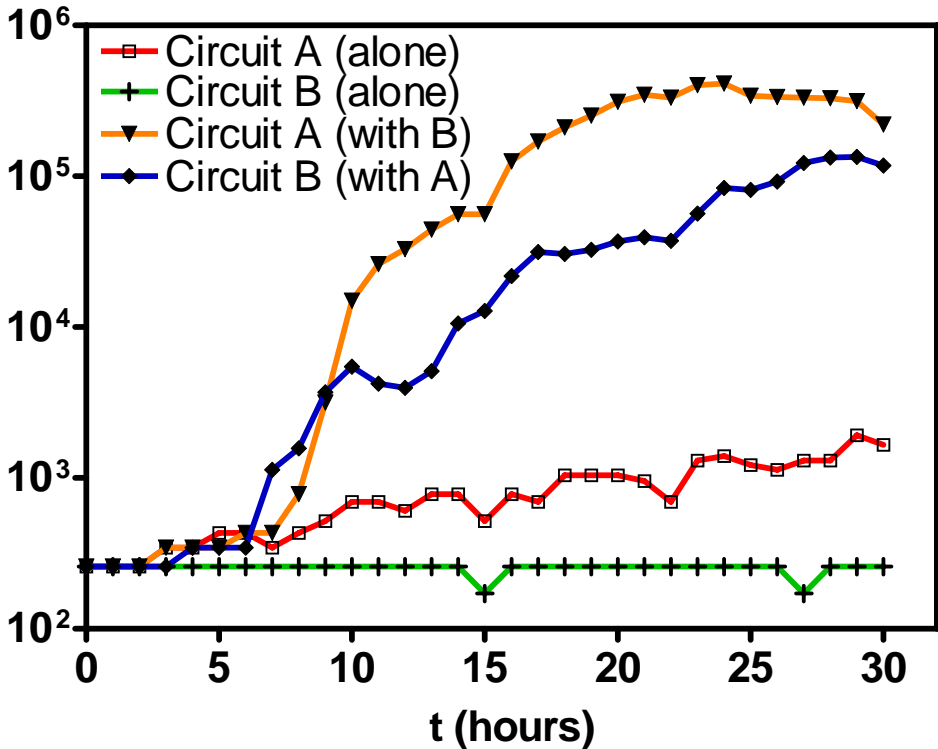

Supplement: pnas_0704256104_5.pdf [file pnas_0704256104_5.pdf]

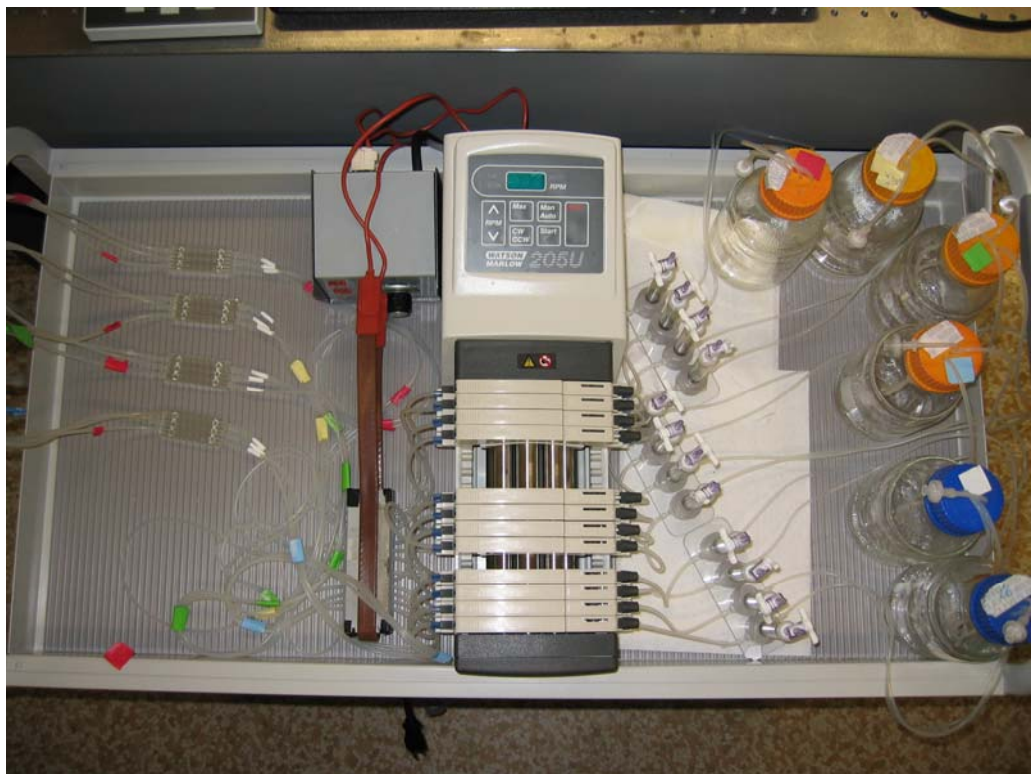

Supplement: pnas_0704256104_6.pdf [file pnas_0704256104_6.pdf]
